# Supplementary material for: Formation of a core–shell droplet in a thermo-responsive ionic liquid/water mixture by using optical tweezers
Source: Royal Society of Chemistry journal article supplement (doi:10.1039/d2cc02699f), 2022-01-01
Supplement: d2cc02699f1.pdf [file d2cc02699f1.pdf]

## **Electronic Supplementary Information**

### Formation of a core-shell droplet in a thermo-responsive ionic liquid/water mixture by optical tweezers

Maho Tanaka<sup>1</sup>, Yasuyuki Tsuboi<sup>1</sup> and Ken-ichi Yuyama\*<sup>1</sup>

<sup>1</sup>Department of Chemistry, Graduate School of Science, Osaka Metropolitan University

#### **S1. Sample preparation**

#### **S2. Optical setup**

#### **S3. Release of the droplet in the prolonged irradiation**

#### **S4. Laser power dependence on the final droplet size**

#### **S5. Stability of the core optically manipulated to a bottom glass substrate**

#### S1. Sample preparation

The ionic liquid was prepared from tetrabutylphosphonium hydroxide (40 w/w% in water) (TCI) and *m*-xylene-4-sulfonic acid (solid, purity: >98.0%) (TCI). Equimolar amounts of them were mixed in a sample tube. The mixture was heated on a hotplate, evaporating the water. The remaining IL was diluted with an appropriate amount of water to adjust the concentration.

#### S2. Optical setup

A continuous-wave (cw) 1064 nm laser beam (Shanghai Laser & Optics Century, IR 1064T5-3000) was used for the optical tweezers. The laser was introduced into an inverted microscope (Nikon, ECLIPSE Ti2) and focused onto a sample solution sandwiched between glass slides through an objective lens (Nikon, ×100, oil, N.A.=1.45). The diameter of the trapping laser was estimated to be 0.90 μm at the focal spot. The optical images were captured with an imaging camera (Omron Sentec, STC-MVS322U3V). For confocal Raman microspectroscopy, a cw 532 nm laser (HC

Photonics) was used as the excitation light source. The scattered light was guided to a pinhole with a diameter of 150  $\mu\text{m}$ . Then, the light was introduced to a spectrograph (SOL instruments) and detected with a charge coupled device (CCD) detector (Andor). Fluorescence images and spectra were obtained under the irradiation of a cw 405 nm laser (Backer & Hickl GmbH, BDS-SM-405-FBE).

### S3. Release of the droplet in the prolonged irradiation

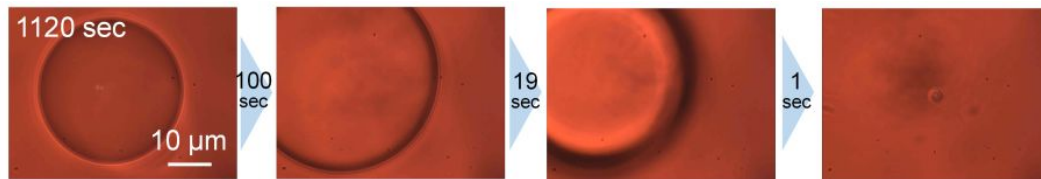

**Fig. S1** Optical transmission micrographs around the focal spot under the prolonged laser irradiation at 630 mW. The sample is different from that of Fig. 2a.

### S4. Laser power dependence on the final droplet size

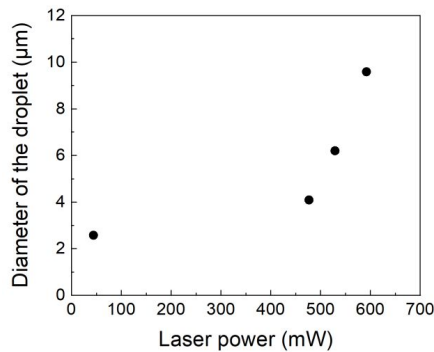

**Fig. S2** The relation of the size of the final microdroplet and the input laser power.

### S5. Stability of the core

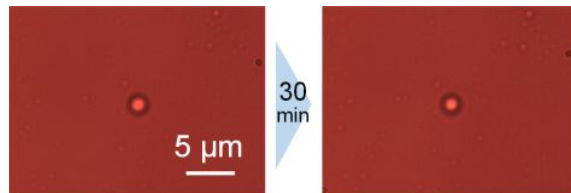

**Fig. S3** Optical transmission micrographs of the core on a bottom glass substrate. The core was moved to the substrate by lowering the focal position and observed for 30 min without the laser irradiation.
